1 **Muscle nonshivering thermogenesis in a feral mammal**

2 Running head: Evidence of muscle NST in wild boar

3 Julia Nowack<sup>1</sup>, Sebastian G. Vetter<sup>1</sup>, Gabrielle Stalder<sup>1</sup>, Johanna Painer<sup>1,2</sup>, Maria Kral<sup>2</sup>, Steve Smith<sup>2</sup>,  
4 Minh Hien Le<sup>1</sup>, Perica Jurcevic<sup>1</sup>, Claudia Bieber<sup>1</sup>, Walter Arnold<sup>1</sup>, Thomas Ruf<sup>1</sup>

5 <sup>1</sup>Department of Integrative Biology and Evolution, Research Institute of Wildlife Ecology, University  
6 of Veterinary Medicine, Vienna, Austria

7

8 <sup>2</sup>Department of Integrative Biology and Evolution, Konrad Lorenz Institute for Ethology, University of  
9 Veterinary Medicine, Vienna, Austria

10

11 Corresponding author: Julia Nowack; contact: [Julia.nowack@vetmeduni.ac.at](mailto:Julia.nowack@vetmeduni.ac.at)

12 **Abstract**

13 While small mammals and neonates are able to maintain an optimal body temperature ( $T_b$ )  
14 independent of ambient conditions by producing heat via nonshivering thermogenesis (NST) in the  
15 brown adipose tissue (BAT), larger mammals and other mammals lacking BAT were long believed to  
16 rely primarily on shivering and behavioural adaptations. However, recently, a second mechanism of  
17 NST was found in skeletal muscle that could play an important role in thermoregulation of such  
18 species. Muscle NST is independent of muscle contractions and produces heat based on the activity  
19 of an ATPase pump in the sarcoplasmic reticulum (SERCA1a) and controlled by the protein sarcolipin.  
20 To evaluate whether muscle NST could indeed play an important role in thermoregulation in species  
21 lacking BAT, we investigated the thermogenic capacities of new-born wild boar piglets. During cold  
22 exposure over the first 5 days of life, total heat production was improved while shivering intensity  
23 decreased, indicating an increasing contribution of NST. Sampling skeletal muscle tissue for analyses  
24 of SERCA activity as well as gene expression of SERCA1a and sarcolipin, we found an age-related  
25 increase in all three variables as well as in  $T_b$ . Hence, the improved thermogenesis during the  
26 development of wild boars is not due to shivering but explained by the observed increase in SERCA  
27 activity. Our results suggest that muscle NST may be the primary mechanism of heat production  
28 during cold stress in large mammals lacking BAT, strengthening the hypothesis that muscle NST has  
29 likely played an important role in the evolution of endothermy.

30

31 **Keywords**

32 Calcium slippage, Cold exposure, Heat production, SERCA, Shivering, Sarcolipin

33 **Introduction**

34 The regulation of a high and stable body temperature ( $T_b$ ) independent of climatic conditions is one  
35 of the most important mechanisms that arose during the evolution of mammals and birds. After  
36 decades of intensive research, it is now well-understood how mammals possessing brown adipose  
37 tissue (BAT) - a specialised thermogenic organ - are able to maintain an optimal  $T_b$  even in cold  
38 environments by using nonshivering thermogenesis (NST) [reviewed in 1]. However, only ~20% of  
39 endothermic birds and mammals actually possess BAT [2]. NST in BAT requires thermogenic  
40 functional uncoupling protein 1 (UCP1) that alters proton conductance in the inner mitochondrial  
41 membrane, leading to heat generation instead of ATP production [3, 4]. Functional UCP1 has not  
42 been found, however, in marsupials or monotremes [5] and typically substantial amounts of BAT are  
43 present only in neonates of large-bodied mammals [6, 7, but see: 8]. Furthermore, a recent study has  
44 shown that UCP1-inactivating mutations have occurred in various mostly large-bodied placental  
45 mammals [9]. Large mammals, such as pigs, are likely able to cope well with cold exposure even  
46 without possessing BAT. Their juveniles, on the other hand, have high surface area-to-volume ratios  
47 and need a high capacity for heat production to maintain a constantly high  $T_b$  [10]. Inside the  
48 mother's womb juveniles are protected against thermal variations and they are exposed to a cold  
49 environment for the first time after birth. In fact, it is known that neonates of many large-bodied  
50 species in which BAT depots are negligible in adults, possess large amounts of BAT [6, 7].

51 It was long believed that species without thermogenic functional UCP1 rely solely on  
52 shivering, a process that on its own is insufficient for the maintenance of a stable  $T_b$  during cold  
53 exposure in UCP1 knockout mice [11]. However, a second mechanism of NST in muscle, which had  
54 been studied in vitro for a long time [12-15], has recently been shown to play an important role in  
55 thermoregulation in mice lacking functional BAT [11]. The mechanism is so far only confirmed as an  
56 additional form of NST in rodents in which the wildtype possesses BAT [11, 16-20], but assumed to

57 occur in all mammals [2, 21]. Furthermore, muscle NST is discussed as a heat production mechanism  
58 that played an important role for the evolution of a high  $T_b$ , i.e. endothermy, in mammals [2, 21], as  
59 endothermy in this group evolved before UCP1- mediated NST [22].

60 In short, muscle NST is based on the activity of the  $Ca^{2+}$ -ATPase pump in the sarcoplasmic  
61 reticulum (SERCA). SERCA1a, the major isoform occurring in skeletal muscle [23], is involved in  
62 muscle contraction via the transport of  $Ca^{2+}$ -ions from the cell lumen into the sarcoplasmic reticulum  
63 [24, 25]. But ATP hydrolysis by SERCA1a can be uncoupled from actual transmembrane transport of  
64  $Ca^{2+}$  by the regulatory protein sarcolipin (SLN) causing the release of the  $Ca^{2+}$ -ions bound to SERCA  
65 back to the cytoplasmic side of the membrane (so called “slippage”) rather than into the  
66 sarcoplasmic reticulum [reviewed in 26]. This results in increased ATP hydrolysis and heat production  
67 in muscle through SERCA1a activity without actual  $Ca^{2+}$ -transport and without muscle contraction  
68 [13, 26-29]. Studies on laboratory mice have shown that muscle NST can compensate for the loss of  
69 UCP1, but muscle NST in wildtype mice is largely masked by heat production in BAT [30, 31]. This  
70 raises the question whether the thermogenic capacity of muscle NST alone can enable mammals to  
71 maintain a stable  $T_b$  under cold conditions.

72 We investigated whether muscle NST is an important and effective mechanism to generate  
73 heat in wild-type mammals lacking BAT, using new-born wild boars (*Sus scrofa*), naturally lacking BAT  
74 [32] and the UCP1-dependent NST [33, 34] as model species. Importantly, juvenile wild boars are  
75 born in early spring, when ambient temperatures ( $T_a$ ) can still be around or below 0°C and  
76 thermoregulatory demands are high. We firstly hypothesized that, if NST plays a significant role for  
77 thermogenesis in piglets, heat production should increase during cold exposure, whereas shivering  
78 should remain constant or may even decrease. We secondly hypothesized that, if heat production is  
79 based on muscle NST, expression levels of SERCA1a and sarcolipin as well as SERCA activity should  
80 be elevated during cold exposure.

## 81 **Material and Methods**

### 82 *Experimental setup*

83 Piglets were born in March 2017 by five sows kept and bred in outdoor enclosures at the Research  
84 Institute of Wildlife Ecology (48.22° N, 16.28° E) of the University of Veterinary Medicine Vienna in  
85 Austria. Each sow was provided with a roofed shelter outfitted with straw in which they gave birth.  
86 Shelters were equipped with IP-cameras and activity of the sows was monitored to know the exact  
87 time of birthing. All animals were exposed to natural  $T_a$  but piglets typically huddled with each other  
88 or with adults. Mean daily  $T_a$  during the 5 days of our study ranged from 5.9 °C to 14.7 °C and nightly  
89 minimum  $T_a$ s were between 1.5 °C and 9.4 °C.

90 We temporarily removed 19 of 29 new-born wild boars from their mothers within the first 24  
91 hours after birth (age 8.5-24 h) and again four days later. Rectal  $T_b$  was taken within 5-10 minutes  
92 after removal from the mother by inserting a thermometer with rectal gel approximately 2 cm into  
93 the rectum. Piglets were weighed to an accuracy of 1 g (Sartorius, Göttingen, Germany) and  
94 equipped with a custom-made acceleration logger (see below) that was firmly attached to their  
95 abdomen with a cohesive bandage (Henry Schein, New York, USA) before being placed individually  
96 into metabolic chambers (40 x 25x 22 cm, volume: 20 l). The metabolic chambers were located inside  
97 a walk-in climate chamber that was set to + 10 °C (mean  $10.3 \pm 0.7$  °C). Individuals were exposed to  
98 cold for approximately 60-90 min and heat production and shivering intensity during cold exposure  
99 were determined (see below). After measurements rectal  $T_b$  was determined again and piglets were  
100 transferred to a surgery room where muscle biopsies were taken (see below).

#### 101 *Metabolic measurements*

102 All experiments were conducted between 0800h and 1630h. Metabolic measurements lasted for 60-  
103 90 min (depending on the activity level of the animal). Animals were allowed to acclimate to cold  
104 conditions for 10 min, before the measurement was started. Energy expenditure was determined by  
105 measuring the rate of  $O_2$  consumption ( $VO_2$ ) as a proxy of metabolic rate using an  $O_2$  and  $CO_2$   
106 analyser (Servopro 4100, Servomex, Crowborough, UK). The metabolic chamber was connected to  
107 the analyser (pull mode; order: metabolic chamber, pump, needle valve, flow meter,  $O_2$  analyser,  $CO_2$   
108 analyser) with airtight tubes. Water vapour was removed from the air prior to analysis using silica

109 gel. A gas switch allowed measurement of air from six metabolic cages and one reference air channel  
110 for one minute each. The analyser was calibrated once a week using a high precision gas-  
111 proportioning pump (H. Wösthoff, Bochum, Germany, type 55A27/7a). Air was continuously drawn  
112 through the cages with pumps at a flow rate of 250 on day 1 and - 330 l h<sup>-1</sup> on day 5. Flow rate  
113 through each metabolic chamber was measured using calibrated thermal mass-flow meters (FMA  
114 3100, Omega Engineering, Stamford, CT, USA). VO<sub>2</sub> was calculated by a self-written R program [35]  
115 using equation 10.6 by Lighton [36] and converted to heat production (watts) assuming 20.1 J ml<sup>-1</sup> O<sub>2</sub>  
116 consumption [37]. VO<sub>2</sub> were computed from the mean of the three lowest consecutive values per  
117 measurement. To standardize measurements we only used the first 30 min of the measurement for  
118 calculations.

### 119 *Shivering*

120 We successfully measured shivering on day 1 and day 5 of 12 cold-exposed piglets by attaching a  
121 custom-made acceleration logger (three axis acceleration sensor ADXL345; 3 x 1 x 45 mm; Li-polymer  
122 rechargeable Battery LP-402025-1S-3; weight with battery of 6.4 g). The sensor of our acceleration  
123 logger measured acceleration in three orthogonal axes (x, y, and z). Sampling rate of the acceleration  
124 sensor was set to 1600 Hz, acceleration range was ± 16 g and had a resolution of 4 mg per axis. The  
125 battery had a capacity of 155 mAh limiting the runtime to approx. 6 hours, which was sufficient for  
126 our needs. We analyzed the acceleration sensor data entirely in the frequency domain. For this  
127 purpose, we calculated the resulting acceleration from the x, y and z-components:

$$128 \quad a(t) = \sqrt{a_x(t)^2 + a_y(t)^2 + a_z(t)^2} .$$

129 Then we subtracted the mean acceleration stemming from gravitation and applied a Fast Fourier  
130 Transformation (FFT) in R (V3.4.2) [38] (*fft* in package 'signal' [39]) to consecutive segments of 6  
131 second intervals in the time domain (see supplementary figure S1). From every FFT output we  
132 extracted the following parameters:

- 133 1. Maximum Amplitude (m/s<sup>2</sup>)

134 2. Frequency at Maximum Amplitude (in Hz)

135 Exposure to 10°C without the opportunity to huddle with conspecifics caused clearly visible shivering  
136 with short intermitted phases of suspension of shivering. To calculate shivering intensity (the  
137 maximum amplitude) we used the same time frame as for metabolic rate calculations, i.e. a total of  
138 30 min, starting after 10 min of acclimatization. The frequency of muscle activation during shivering  
139 thermogenesis is correlated with body mass in mammals [40] and is reported to be:  $\log f = 1.85 - 0.18$   
140  $\log m$ , where  $f$  is the mean shivering frequency in Hz and  $m$  is the mean body mass in g [40]. Based on  
141 this equation the shivering frequency of day 1 to day 5 old piglets with a mean body mass of 1700 g  $\pm$   
142 306 g is predicted to be 18.55 Hz. We therefore restricted our analyses to frequencies between 10 Hz  
143 and 30 Hz and excluded frequencies above or below this range from the analysis. Measured mean  
144 shivering frequency at maximum amplitude for piglets was with 17.97  $\pm$  1.66 Hz (N= 24) in the  
145 predicted range and did not differ between days ( $\chi^2 = 0.540$ , df= 1, p= 0.462).

146 *Biopsies*

147 80-100 mg muscle tissue was taken with a biopsy needle from the thigh region of the piglets  
148 (*Musculus semimembranosus*) under standard surgical conditions. The procedure was conducted  
149 under general anaesthesia in combination with local anaesthesia. The anaesthesia was induced by  
150 placing a mask over the piglets mouth and nose, using an Isofluran gas (Isofluran, Isoba, MSD animal  
151 health, Vienna, Austria) inhalation machine and medical oxygen. Pain relief was achieved by injecting  
152 local anaesthetics (Lidocain, Xylocain 2 % with Epinephrin 1:100,000. Mibe GmbH, Brehna, Germany)  
153 10 min prior biopsy in the proximal region of the *M. semimembranosus* and the skin. Anti-  
154 inflammatory and pain relief treatment was furthermore gained by injecting Meloxicam 10 min prior  
155 biopsy intramuscularly (Meloxicam 0.4 mg/kg, Metacam 2% inj., Boehringer Ingelheim Vetmedica,  
156 Ingelheim, Germany). During the entire procedure, vital parameters (respiration rate, peripheral  
157 haemoglobin oxygen saturation as measured by pulse oximetry (SpO<sub>2</sub>), heart rate, T<sub>b</sub>) and  
158 anaesthetic depth were monitored. The skin and muscle fascia incisions were closed separately in  
159 two layers with absorbable sutures (Surgicryl USP 2/0 PGA, SMI AG, Hünningen, Belgium). Piglets

160 were marked with an ear tag for further individual recognition. After the biopsy the juveniles were  
161 monitored and kept in a warm environment for recovery from anaesthesia until they were moved to  
162 their enclosure. Piglets were fed with 1 mL of glucose solution orally (50 % glucose infusion, B.Braun  
163 AG, Melsungen, Germany) before being returned to their mothers. Piglets were never kept away  
164 from their mother for more than 3-4 hours. The muscle tissue sample was split for biochemical as  
165 well as genetic analyses. We were able to obtain samples on both days of 17 piglets. The two animals  
166 for which we only obtained one sample were excluded from further analyses regarding SERCA1a and  
167 SLN. For two further animals tissue material was too small to be used for biochemical analyses, which  
168 reduced the sample size for SERCA activity to N= 15.

#### 169 *Biochemical analysis*

170 Approximately 50 mg of muscle tissue of 15 piglets were snap frozen within 10 min and later stored  
171 at -80°C until used to prepare muscle homogenates according to the procedures described in Giroud  
172 et al. [41]. Homogenates were used to measure SERCA activities by a standard coupled enzyme  
173 assay, in which the rate of SERCA ATP hydrolysis was calculated from spectrophotometric recording  
174 (method previously described by Simonides et al. [42]). While this assay is measuring overall ATPase  
175 activity of all isoforms of SERCA present in the sample, SERCA activity is assumed to primarily reflect  
176 SERCA1a activity, because SERCA1a is the major isoform found in fast twitching muscles, such as *M.*  
177 *semimembranosus* [23]. SERCA activity was divided by total protein concentration (determined with  
178 Bradford method [43]) in order to normalize the ATPase activity values for variations in total protein  
179 concentrations among samples. More details on isolation of muscle homogenates and SERCA activity  
180 measurements can be found in the supplementary methods.

#### 181 *Genetical analyses*

182 Further, 30 mg muscle tissue of 17 piglets were directly stored in RNeasy<sup>®</sup>, kept in the fridge for 24  
183 hours and stored at -80°C until RNA was extracted using the RNeasy Fibrous Tissue Mini Kit (Qiagen,  
184 Hilden, Germany). Gene expression levels for SLN and SERCA1a were analysed from cDNA via Droplet

185 Digital PCR (ddPCR™). RNA was reverse-transcribed with MultiScribe™ Reverse Transcriptase (High  
186 Capacity cDNA Reverse Transcription Kits, ThermoFisher Scientific) using random hexamer primers.  
187 Primer sequences for the target gene, SLN, were available from Vangheluwe et al. [44]. No primer  
188 sequence was available for SERCA1a so we designed suitable primers from the reference sequence  
189 NM\_001204393.1 with the assistance of the NCBI primer design tool [45]. Primers for candidate  
190 reference genes *Hypoxanthine Phosphoribosyltransferase 1 (HPRT1)* and *Glucuronidase Beta (GUSB)*  
191 were available from [46]. All primer sequences as well as additional methodological details can be  
192 found in the supplementary methods and table S1. Data acquisition was accomplished by the  
193 QX200™ Droplet Reader (Bio-Rad), and analysed using the Bio-Rad Droplet Digital™ PCR QuantaSoft  
194 software. Expression levels are given as the relative ratio of the concentration (copies/μl) of the  
195 assay target gene over the concentration of the reference gene. Importantly, SLN protein expression  
196 has been shown to correlate well with SLN mRNA expression [31].

#### 197 *Data analyses*

198 Data are presented as mean ± 1 S.E.; N denotes the number of individuals. Data were analysed in R  
199 (V3.4.2)[38]. We first tested whether SERCA1a gene expression, SLN gene expression, SERCA activity  
200 and  $T_b$  increased with age (using group “day 1” and “day 5”) by employing a linear-mixed effect  
201 model followed by type II sum-of-squares ANOVA (lme in library ‘nlme’ [47]; Anova in library ‘car’  
202 [48]). All models were corrected for non-independence by including the individual’s mother as well  
203 as the individual’s ID as nested random effects. To investigate whether SERCA activity was explained  
204 by SLN and SERCA1a gene expression, we additionally computed linear-mixed effect models  
205 including random effects as described above (pseudo  $r^2$  was calculated using sem.model.fits in library  
206 ‘piecewiseSEM’ [49]). For the cold exposure experiments we tested whether there was an age  
207 depended change in heat production, shivering intensity and shivering frequency as described above.  
208 In tests for changes of total heat production, we included body mass as a covariate. Mass-specific  
209 rates of heat production were computed for graphical presentation, but not used for statistical tests.  
210 To test  $T_b$  regulation over the time of cold exposure we computed a linear mixed effect model, again



211 with ID and mother as random effects,  $T_b$  at the end of exposure as the response variable, and day (1  
212 or 5), initial  $T_b$ , and duration of cold exposure (60-90 min) as fixed effects. We used Shapiro-Wilk  
213 tests to assess the normality of model residuals. If needed, data were Box-Cox transformed.

## 214 *Results*

### 215 *Cold exposure experiment*

216 Heat production during cold exposure did not significantly differ between day 1 and day 5 when  
217 adjusted for the increase in body mass ( $\chi^2= 1.92$ ,  $df= 1$ ,  $p= 0.165$ ;  $N= 19$ ; Fig. 3a), although shivering  
218 intensity decreased between both measurements by 50% ( $\chi^2= 9.00$ ,  $df= 1$ ,  $p= 0.003$ ;  $N= 12$ ; Fig. 3b).  
219  $T_b$  after cold exposure was dependent on  $T_b$  at start of the experiment (Tab. 2;  $\chi^2= 8.01$ ,  $df= 1$ ,  
220  $p=0.0046$ ), but did not significantly differ between the days ( $\chi^2= 3.33$ ,  $df= 1$ ,  $p= 0.0679$ ) and was not  
221 dependent on the duration of cold exposure ( $\chi^2= 1.86$ ,  $df= 1$ ,  $p= 0.173$ ).

222

### 223 *SERCA1a, SLN and SERCA activity*

224 SERCA activity, as well as SERCA1a and SLN mRNA expressions increased significantly from day 1 to  
225 day 5 of the juveniles' life (Tab. 1; SERCA1:  $\chi^2= 15.29$ ,  $df= 1$ ,  $p<0.0001$ ; SLN:  $\chi^2= 9.63$ ,  $df= 1$ ,  $p= 0.002$ ;  
226 SERCA activity:  $\chi^2= 16.81$ ,  $df= 1$ ,  $p<0.0001$ ) and SERCA1a and SLN expression levels were positively  
227 correlated ( $\chi^2= 32.2$ ,  $df= 1$ ,  $p<0.0001$ , marginal pseudo  $r^2$ : 0.51; Fig.1). Importantly, the age-related  
228 increase of SERCA activity was linked to the increase in SLN gene expression, when tested in a single-  
229 predictor model ( $\chi^2= 13.68$ ,  $df= 1$ ,  $p<0.001$ ) as well as in multiple regression together with SERCA1  
230 ( $\chi^2= 6.57$ ,  $df= 1$ ,  $p= 0.01$ ; Fig.2a); SERCA1a gene expression was only significantly influencing SERCA  
231 activity when used in a single-predictor model ( $\chi^2= 7.23$ ,  $df= 1$ ,  $p= 0.007$ ), but not when tested  
232 together with SLN ( $\chi^2= 0.002$ ,  $df= 1$ ,  $p= 0.967$ ; Fig. 2b).  $T_b$  of piglets increased significantly from day 1  
233 to day 5 ( $\chi^2= 41.01$ ,  $df= 1$ ,  $p<0.001$ ; Tab.2) and this increase was linked to SERCA activity ( $\chi^2= 5.22$ ,  $df=$   
234  $1$ ,  $p= 0.02$ ).

235

236 **Discussion**

237 Our study revealed that shivering intensity decreases from day 1 to day 5 in juveniles exposed to  
238 10°C, while heat production during cold is increasing proportional to body mass and the level at  
239 which  $T_b$  is maintained increases. This result is clear evidence for an increasing contribution of NST to  
240 thermogenesis during cold exposure in piglets over the first days of life. The finding that  
241 simultaneously, SERCA activity and the expression of SERCA1a and SLN were recruited points to  
242 muscle NST and increased SERCA activity as the principal source of heat production, as we can rule  
243 out UCP1- mediated NST in this species.

244 Our statistical analysis suggests that the increase in SERCA activity between day 1 and day 5  
245 was mainly due to an SLN controlled up-regulation of ATP hydrolysis by SERCA1a instead of an  
246 increase in SERCA1a molecules. This is in accordance with previous data on mice in which  
247 upregulated SLN expression led to an increasing contribution of SERCA-based  $Ca^{2+}$ -slippage to heat  
248 production [11, 17].

249 In mice and rats, in which neonates are born blind and naked ('altricial' neonates), the  
250 transcription and translation of SLN is highest after birth and gradually decreases with development  
251 when kept at normal housing conditions (~23°C) [16, 31], while the amount of BAT is successively  
252 recruited [1]. However, when kept under cold conditions juvenile mice keep SLN up-regulated for  
253 improved thermoregulatory capacity [31], suggesting that both mechanisms of NST are necessary for  
254 an effective maintenance of a high  $T_b$  during cold exposure in new born rodents. In adult mice,  
255 however, both mechanisms of NST, UCP1-mediated as well as muscle NST, can compensate for the  
256 loss of one system [50]. In contrast, our data indicate that muscle NST, in combination with some  
257 shivering, is already sufficient to maintain a stable  $T_b$  for short-term cold exposure in juvenile wild  
258 boar, which are markedly larger than juvenile mice and are already born with fur and much better  
259 thermogenic abilities ('precocial' juveniles). Interestingly, in other precocial species, such as sheep  
260 and goats that possess functional UCP1, BAT is recruited already before birth [1]. Furthermore,

261 reconstituted function of UCP1 can further improve thermoregulatory function of cold exposed 6-  
262 months old Bama pigs, a cold-sensitive pig breed.

263 Our finding that muscle NST is involved in thermoregulation of juvenile wild boars and allows  
264 a near stable  $T_b$  even during short-term cold exposure supports the hypothesis that muscle NST may  
265 be the primary mechanism of heat production during cold-exposure in large mammals lacking BAT.  
266 While the evolution of BAT has often been related to the ability of small placental mammals to  
267 colonize colder habitats [4, 51, 52], a recent study has shown that UCP1-inactivating mutations have  
268 occurred in at least eight of the 18 placental mammalian orders, mainly in larger-bodied species [53],  
269 such as pigs. It therefore appears that the combination of shivering and muscle NST is sufficient for  
270 heat production in large mammals. Pigs, for example, likely lost UCP1 function and the ability to use  
271 BAT for thermoregulation because of absent or only weak selection for this mechanism in a warm  
272 climate [54]; all species except the wild boar live only in tropical or subtropical habitats. In addition  
273 to heat production via muscle NST, wild boar apparently evolved compensatory mechanisms to cope  
274 with adverse thermal conditions in northern habitats, such as larger adult body size [55], building  
275 insulating nests for offspring, and synchronizing reproduction within social groups or enabling piglets  
276 to huddle in large groups of combined litters [54, 56]. Behavioural thermoregulation is less  
277 energetically costly than NST [57] and a study on winter mortality of juvenile wild boar has shown  
278 that the negative effects of cold winters can be compensated by high availability of food resources  
279 [55].

280 In addition to our finding that SLN-mediated NST in skeletal muscle is involved in piglet  
281 thermoregulation, recent studies on domestic pig breeds suggest that SERCA2b (another isoform of  
282 SERCA) and UCP3 might also influence pig thermoregulation [58, 59]. However, so far the importance  
283 of both mechanisms is unclear [e.g. 2] and the evolution of a compensatory mechanism after the pigs  
284 colonized cold habitats is likely [58], while muscle NST is discussed as a potentially evolutionary old  
285 heat production mechanism [e.g. 2, 21]. Whether and to what extent domestic pig breeds also  
286 possess muscle NST remains speculative. While piglets of wild boar are accustomed to deal with

287 temperatures around or below zero degrees, domestic pigs are kept under warm conditions (20-  
288 35°C). Therefore, it cannot be ruled out that the extreme susceptibility of pigs to cold is partly due to  
289 inadvertent selection against high thermogenic capacity during domestication. Previous studies on  
290 thermoregulation of juvenile domestic pigs have also found that shivering intensity decreased during  
291 the first days after birth while heat production and blood flow to muscles simultaneously increased  
292 [60-62]. While this was originally attributed to an increase in shivering efficiency [60, 61], it seems  
293 questionable whether an increased thermogenesis by increased efficiency of shivering is physically  
294 possible. Our data now suggest that the improved thermogenesis found in domestic pigs, similarly to  
295 wild boar, was not due to an increase in shivering efficiency, but explained by an increase in muscle  
296 NST.

297 Taken together, our data show for the first time that muscle-based NST via SERCA1a plays a  
298 role in the thermoregulation of wild type mammals lacking BAT and that muscle NST can replace  
299 UCP1-mediated NST. The function of UCP1 as a thermogenic protein has occurred after the  
300 divergence between placental and marsupial mammals [22], suggesting that the evolution of  
301 endothermy in ancestral mammals was independent of heat production in BAT. Although the earth  
302 was likely warmer, ancestral mammals still would have experienced daily and yearly fluctuations in  
303  $T_a$ , likely similar to temperatures found in tropical areas today, which can get rather cold during the  
304 night. Therefore, while heat produced as a by-product of metabolic processes as well as basking [63]  
305 would have allowed the establishment of a stable  $T_b$  during a big part of the day, muscle NST was  
306 likely important during the colder night hours.

### 307 *Ethics statement*

308 The study was approved by the institutional ethics and animal welfare committee and the national  
309 authority according to §§ 26ff. of Animal Experiments Act, Tierversuchsgesetz 2012 – TVG 2012  
310 (BMFWF-68.205/0171-WF/V/3b/2016).

### 311 *Data accessibility*

312 The data will be made available at figshare upon acceptance of the publication.

313 *Acknowledgements*

314 We thank Peter Steiger and Michaela Salaba for their help with animal maintenance, Joy Einwaller,  
315 Jessica S. Cornils and Arne Müller for help during the experiments, Omid Hekmat and Michael  
316 Hämmerle for biochemical analyses and Martin Olesch, Thomas Paumann and Radovan Kovacki for  
317 infrastructural support. The study was supported by funding from the Humboldt foundation to JN  
318 and by the University of Veterinary Medicine, the City of Vienna, and the Government of Lower  
319 Austria.

320 *Author Contributions*

321 JN and TR designed the experiments, JN conducted the experiments, analysed the data and wrote  
322 the manuscript, SV was involved in the performance of the experiments and helped with statistical  
323 analyses, GS and JP performed the biopsies, ML and OH conducted the biochemical analyses, MK and  
324 SS conducted the genetic analyses, JP designed the accelerometers and computed the shivering  
325 intensities, CB designed the enclosures and organised logistics, CB and WA were involved in the  
326 discussion of the experimental plan. All authors commented on the manuscript.

327 *Declaration of Interests*

328 The authors declare no competing interests.

329 *References*

- 330 1. Cannon, B. and J. Nedergaard, *Brown adipose tissue: function and physiological*  
331 *significance*. *Physiological Reviews*, 2004. **84**(1): p. 277-359.
- 332 2. Nowack, J., et al., *Muscle non-shivering thermogenesis and its role in the evolution*  
333 *of endothermy*. *Frontiers in Physiology*, 2017. **8**(889).
- 334 3. Hansen, E. and J. Knudsen, *Parallel measurements of heat production and*  
335 *thermogenin content in brown fat cells during cold acclimation of rats*. *Bioscience*  
336 *Reports*, 1986. **6**(1): p. 31-38.
- 337 4. Heaton, G., et al., *Brown-adipose-tissue mitochondria: photoaffinity labelling of the*  
338 *regulatory site of energy dissipation*. *European Journal of Biochemistry*, 1978. **82**:  
339 p. 515-521.
- 340 5. Hayward, J.S. and P.A. Lisson, *Evolution of brown fat: its absence in marsupials and*  
341 *monotremes*. *Canadian Journal of Zoology*, 1992. **70**: p. 171-179.
- 342 6. Vatnick, I., et al., *Regression of brown adipose tissue mitochondrial function and*  
343 *structure in neonatal goats*. *American Journal of Physiology-Endocrinology and*  
344 *Metabolism*, 1987. **252**(3): p. E391-E395.
- 345 7. Alexander, G., J. Bennett, and R. Gemmell, *Brown adipose tissue in the new - born*  
346 *calf (Bos taurus)*. *The Journal of Physiology*, 1975. **244**(1): p. 223-234.
- 347 8. Gilsanz, V., H.H. Hu, and S. Kajimura, *Relevance of brown adipose tissue in infancy*  
348 *and adolescence*. *Pediatric research*, 2013. **73**(1): p. 3-9.
- 349 9. Gaudry, M.J., et al., *Inactivation of thermogenic UCP1 as a historical contingency in*  
350 *multiple placental mammal clades*. *Science Advances*, 2017. **3**(7): p. e1602878.
- 351 10. Barnett, S.A. and A.C. Neil, *The growth of infant mice at two temperatures*. *Journal*  
352 *of Reproduction and Fertility*, 1972. **29**(2): p. 191-201.
- 353 11. Bal, N.C., et al., *Sarcolipin is a newly identified regulator of muscle-based*  
354 *thermogenesis in mammals*. *Nature Medicine*, 2012. **18**(10): p. 1575-1579.
- 355 12. de Meis, L., *Ca<sup>2+</sup>-ATPases (SERCA): energy transduction and heat production in*  
356 *transport ATPases*. *The Journal of Membrane Biology*, 2002. **188**(1): p. 1-9.
- 357 13. de Meis, L., *Uncoupled ATPase activity and heat production by the sarcoplasmic*  
358 *reticulum Ca<sup>2+</sup>-ATPase. Regulation by ADP*. *Journal of Biological Chemistry*, 2001.  
359 **276**(27): p. 25078-25087.
- 360 14. de Meis, L., *Role of the sarcoplasmic reticulum Ca<sup>2+</sup>-ATPase on heat production and*  
361 *thermogenesis*. *Bioscience Reports*, 2001. **21**(2): p. 113-137.
- 362 15. de Meis, L., A. Arruda, and D. Carvalho, *Role of sarco/endoplasmic reticulum Ca<sup>2+</sup>-*  
363 *ATPase in thermogenesis*. *Bioscience Reports*, 2005. **25**(3-4): p. 181-190.
- 364 16. Babu, G.J., et al., *Differential expression of sarcolipin protein during muscle*  
365 *development and cardiac pathophysiology*. *Journal of Molecular and Cellular*  
366 *Cardiology*, 2007. **43**(2): p. 215-222.
- 367 17. Bal, N.C., et al., *Increased reliance on muscle-based thermogenesis upon acute*  
368 *minimization of brown adipose tissue function*. *Journal of Biological Chemistry*,  
369 **291**(33): p. 17247-17257.
- 370 18. Pant, M., N.C. Bal, and M. Periasamy, *Sarcolipin: a key thermogenic and metabolic*  
371 *regulator in skeletal muscle*. *Trends in Endocrinology & Metabolism*, 2016.  
372 **27**(12): p. 881-892.
- 373 19. Anderson, K.J., *Multi-omic analysis of hibernator skeletal muscle and regulation of*  
374 *calcium handling*. 2016, University of Minnesota.
- 375 20. Anderson, K.J., et al., *Proteogenomic analysis of a hibernating mammal indicates*  
376 *contribution of skeletal muscle physiology to the hibernation phenotype*. *Journal of*  
377 *Proteome Research*, 2016. **15**(4): p. 1253-1261.

- 378 21. Rowland, L.A., N.C. Bal, and M. Periasamy, *The role of skeletal-muscle-based*  
379 *thermogenic mechanisms in vertebrate endothermy*. Biological Reviews, 2014.  
380 **10.1111/brv.12157**.
- 381 22. Saito, S., C.T. Saito, and R. Shingai, *Adaptive evolution of the uncoupling protein 1*  
382 *gene contributed to the acquisition of novel nonshivering thermogenesis in*  
383 *ancestral eutherian mammals*. Gene, 2008. **408**(1-2): p. 37-44.
- 384 23. Periasamy, M. and A. Kalyanasundaram, *SERCA pump isoforms: their role in*  
385 *calcium transport and disease*. Muscle & Nerve, 2007. **35**(4): p. 430-442.
- 386 24. Hasselbach, W. and M. Makinose, *Die Calciumpumpe der Erschlaffungsgrana des*  
387 *Muskels und ihre Abhängigkeit von der ATPSpaltung*. Biochemische Zeitschrift,  
388 **1961**. **333**: p. 518-528.
- 389 25. Periasamy, M. and S. Huke, *SERCA pump level is a critical determinant of Ca<sup>2+</sup>*  
390 *homeostasis and cardiac contractility*. Journal of Molecular and Cellular  
391 Cardiology, 2001. **33**(6): p. 1053-1063.
- 392 26. Mall, S., et al., *The presence of sarcolipin results in increased heat production by*  
393 *Ca<sup>2+</sup>-ATPase*. Journal of Biological Chemistry, 2006. **281**(48): p. 36597-36602.
- 394 27. Asahi, M., et al., *Sarcolipin regulates sarco(endo)plasmic reticulum Ca<sup>2+</sup>-ATPase*  
395 *(SERCA) by binding to transmembrane helices alone or in association with*  
396 *phospholamban*. Proceedings of the National Academy of Sciences, 2003. **100**(9):  
397 p. 5040-5045.
- 398 28. Maurya, S.K., et al., *Sarcolipin is a key determinant of the basal metabolic rate, and*  
399 *its overexpression enhances energy expenditure and resistance against diet-induced*  
400 *obesity*. Journal of Biological Chemistry, 2015. **290**(17): p. 10840-10849.
- 401 29. MacLennan, D.H., M. Asahi, and A.R. Tupling, *The regulation of SERCA-type pumps*  
402 *by phospholamban and sarcolipin*. Annals of the New York Academy of Sciences,  
403 **2003**. **986**(1): p. 472-480.
- 404 30. Bal, Naresh C., et al., *Mild cold induced thermogenesis: are BAT and skeletal muscle*  
405 *synergistic partners?* Bioscience Reports, 2017. **37**(5): p. BSR20171087.
- 406 31. Pant, M., N.C. Bal, and M. Periasamy, *Cold adaptation overrides developmental*  
407 *regulation of sarcolipin expression in mice skeletal muscle: SOS for muscle-based*  
408 *thermogenesis?* Journal of Experimental Biology, 2015. **218**(15): p. 2321-2325.
- 409 32. Jastroch, M. and L. Andersson, *When pigs fly, UCP1 makes heat*. Molecular  
410 Metabolism, 2015. **4**(5): p. 359-362.
- 411 33. Berg, F., U. Gustafson, and L. Andersson, *The uncoupling protein 1 gene (UCP1) is*  
412 *disrupted in the pig lineage: a genetic explanation for poor thermoregulation in*  
413 *piglets*. PLoS Genet, 2006. **2**(8): p. e129.
- 414 34. Hou, L., et al., *Pig has no uncoupling protein 1*. Biochemical and Biophysical  
415 Research Communications, 2017. **487**(4): p. 795-800.
- 416 35. R Core Team, *R: A language and environment for statistical computing*. 2014, R  
417 Foundation for Statistical Computing: Vienna, Austria.
- 418 36. Lighton, J.R.B., *Measuring metabolic rates. A manual for scientists*. 2008, New  
419 York: Oxford University Press.
- 420 37. Schmidt-Nielsen, K., *Animal physiology: adaptation and environment*. 1983,  
421 Cambridge: Cambridge University Press.
- 422 38. R Development Core Team, *R: a language and environment for statistical*  
423 *computing*. 2014, R Foundation for Statistical Computing: Vienna, Austria.
- 424 39. Developers, S. *Signal: signal processing*. 2014; Available from: [http://r-forge.r-](http://r-forge.r-project.org/projects/signal/)  
425 [project.org/projects/signal/](http://r-forge.r-project.org/projects/signal/).
- 426 40. Spaan, G. and F.W. Klusmann, *Die Frequenz des Kältezitterns bei Tierarten*  
427 *verschiedener Größe*. Pflügers Archiv, 1970. **320**(4): p. 318-333.

- 428 41. Giroud, S., et al., *Membrane phospholipid fatty acid composition regulates cardiac*  
429 *SERCA activity in a hibernator, the Syrian hamster (Mesocricetus auratus)*. PLoS  
430 ONE, 2013. **8**(5): p. e63111.
- 431 42. Simonides, W.S. and C. van Hardeveld, *An assay for sarcoplasmic reticulum Ca<sup>2+</sup>-*  
432 *ATPase activity in muscle homogenates*. Analytical Biochemistry, 1990. **191**(2): p.  
433 321-331.
- 434 43. Bradford, M.M., *A rapid and sensitive method for the quantitation of microgram*  
435 *quantities of protein utilizing the principle of protein-dye binding*. Analytical  
436 Biochemistry, 1976. **72**(1): p. 248-254.
- 437 44. Vangheluwe, P., et al., *Sarcolipin and phospholamban mRNA and protein*  
438 *expression in cardiac and skeletal muscle of different species*. Biochemical Journal,  
439 2005. **389**(Pt 1): p. 151-159.
- 440 45. Ye, J., et al., *Primer-BLAST: a tool to design target-specific primers for polymerase*  
441 *chain reaction*. BMC Bioinformatics, 2012. **13**: p. 134-134.
- 442 46. Charron, S., et al., *Identification of region-specific myocardial gene expression*  
443 *patterns in a chronic swine model of repaired tetralogy of fallot*. PLOS ONE, 2015.  
444 **10**(8): p. e0134146.
- 445 47. Pinheiro, J., et al., *Linear and nonlinear mixed effects models*. 2014.
- 446 48. Fox, J. and S. Weisberg, *An companion to applied regression*. 2 ed. 2011, Thousand  
447 Oaks, CA: Sage.
- 448 49. Lefcheck, J.S., *piecewiseSEM: Piecewise structural equation modelling in r for*  
449 *ecology, evolution, and systematics*. Methods in Ecology and Evolution, 2016. **7**(5):  
450 p. 573-579.
- 451 50. Rowland, L.A., et al., *Uncoupling protein 1 and sarcolipin are required to maintain*  
452 *optimal thermogenesis, and loss of both systems compromises survival of mice*  
453 *under cold stress*. Journal of Biological Chemistry, 2015. **290**(19): p. 12282-  
454 12289.
- 455 51. Chaffee, R.R.J., et al., *Studies on thermogenesis in brown adipose tissue in*  
456 *temperature-acclimated Macaca mulatta*. Comparative Biochemistry and  
457 Physiology Part A: Physiology, 1975. **50**(2): p. 303-306.
- 458 52. Foster, D. and M. Frydman, *Nonshivering thermogenesis in the rat. II.*  
459 *Measurements of blood flow with microspheres point to brown adipose tissue as the*  
460 *dominant site of the calorogenesis induced by noradrenaline*. Canadian Journal of  
461 Physiology and Pharmacology, 1978. **56**: p. 110-122.
- 462 53. Gaudry, M., et al., *Inactivation of thermogenic UCP1 as a historical contingency in*  
463 *multiple placental mammal clades*. bioRxiv, 2016.
- 464 54. Berg, F., U. Gustafson, and L. Andersson, *The uncoupling protein 1 gene (UCP1) is*  
465 *disrupted in the pig lineage: a genetic explanation for poor thermoregulation in*  
466 *piglets*. PLoS Genetics, 2006. **2**(8): p. e129.
- 467 55. Vetter, S.G., et al., *What is a mild winter? Regional differences in within-species*  
468 *responses to climate change*. PLoS ONE, 2015. **10**(7): p. e0132178.
- 469 56. Graves, H.B., *Behavior and ecology of wild and feral swine (Sus scrofa)*. Journal of  
470 Animal Science, 1984. **58**(2): p. 482-492.
- 471 57. Terrien, J., M. Perret, and F. Aujard, *Behavioral thermoregulation in mammals: a*  
472 *review*. Frontiers in Bioscience, 2011. **16**: p. 1428-1444.
- 473 58. Lin, J., et al., *Cold adaptation in pigs depends on UCP3 in beige adipocytes*. Journal  
474 of Molecular Cell Biology, 2017(1-12).
- 475 59. Ikeda, K., et al., *UCP1-independent signaling involving SERCA2b-mediated calcium*  
476 *cycling regulates beige fat thermogenesis and systemic glucose homeostasis*. Nature  
477 Medicine, 2017. **23**: p. 1454.



- 478 60. Berthon, D., et al., *Metabolic changes associated with sustained 48-hr shivering*  
479 *thermogenesis in the newborn pig*. Comparative Biochemistry and Physiology Part  
480 B: Biochemistry and Molecular Biology, 1996. **114**(4): p. 327-335.
- 481 61. Berthon, D., P. Herpin, and J. Le Dividich, *Shivering thermogenesis in the neonatal*  
482 *pig*. Journal of Thermal Biology, 1994. **19**(6): p. 413-418.
- 483 62. Herpin, P., M. Damon, and J. Le Dividich, *Development of thermoregulation and*  
484 *neonatal survival in pigs*. Livestock Production Science, 2002. **78**(1): p. 25-45.
- 485 63. Geiser , F., et al., *Phoenix from the ashes: fire, torpor, and the evolution of*  
486 *mammalian endothermy*. Frontiers in Physiology, 2017.
- 487

**Table 1: Comparison of physiological SERCA activity and the amount of mRNA expression of SLN and SERCA1 at day 1 and day 5 after birth.** Sample sizes of tested wild boar piglets are given in brackets. Different letters indicate significant differences. Statistical test results are reported in the text.

\* Gene expression is reported in copies per  $\mu\text{l}$  target gene/copies per  $\mu\text{l}$  reference gene (HPRT1).

<sup>†</sup> SERCA activity is reported as ATP hydrolyses per minute and mg total protein.

|       | Body mass (g)               | SERCA activity <sup>†</sup>            | SERCA1a mRNA expression*                | SLN mRNA expression*                   |
|-------|-----------------------------|----------------------------------------|-----------------------------------------|----------------------------------------|
| Day 1 | 1411.9 $\pm$ 16.5<br>(N=19) | 0.36 $\pm$ 0.07<br>(N=15) <sup>a</sup> | 109.6 $\pm$ 19.7<br>(N=17) <sup>a</sup> | 40.9 $\pm$ 7.8<br>(N=17) <sup>a</sup>  |
| Day 5 | 1987.6 $\pm$ 29.0<br>(N=19) | 0.96 $\pm$ 0.12<br>(N=15) <sup>b</sup> | 320.1 $\pm$ 47.2<br>(N=17) <sup>b</sup> | 93.7 $\pm$ 14.5<br>(N=17) <sup>b</sup> |

**Table 2: Body temperature ( $T_b$ ) regulation during cold exposure at 15°C (mean  $\pm$  SD).** Statistical test results are reported in the text.

|                                 | Day 1                  | Day 5                  |
|---------------------------------|------------------------|------------------------|
| $T_b$ (°C) before cold exposure | 38.6 $\pm$ 0.09 (N=19) | 39.2 $\pm$ 0.07 (N=19) |
| $T_b$ (°C) after cold exposure  | 38.6 $\pm$ 0.09 (N=19) | 39.0 $\pm$ 0.07 (N=18) |

#### Figure legends

**Figure 1: Correlation of SERCA1a and SLN gene expression.** The expression of both genes was significantly correlated ( $\chi^2=32.2$ ,  $df=1$ ,  $p<0.0001$ , marginal pseudo  $r^2$ : 0.51). Gene expression is reported in copies per  $\mu\text{l}$  target gene/copies per  $\mu\text{l}$  reference gene (HPRT1).

**Figure 2ab: Partial regression plots of the effect of SLN and SERCA1a gene expression on SERCA activity.** The increase of SERCA activity was linked to SLN gene expression ( $\chi^2=6.57$ ,  $df=1$ ,  $p=0.01$ ), while SERCA1a gene expression had no significant effect on SERCA activity when tested together with SLN ( $\chi^2=0.002$ ,  $df=1$ ,  $p=0.967$ ). Gene expression is reported in copies per  $\mu\text{l}$  target gene/copies per  $\mu\text{l}$  reference gene (HPRT1), SERCA activity as ATP hydrolyses per minute and mg total protein.

**Figure 3ab: Change in heat production and shivering between day 1 and day 2.** Different letters indicate significant differences. Heat production, adjusted for the increase in body mass, did not significantly differ between days (N=19;  $\chi^2=1.92$ ,  $df=1$ ,  $p=0.165$ ), whereas shivering significantly decreased (N=12;  $\chi^2=9.00$ ,  $df=1$ ,  $p=0.003$ ).

SERCA1 gene expression

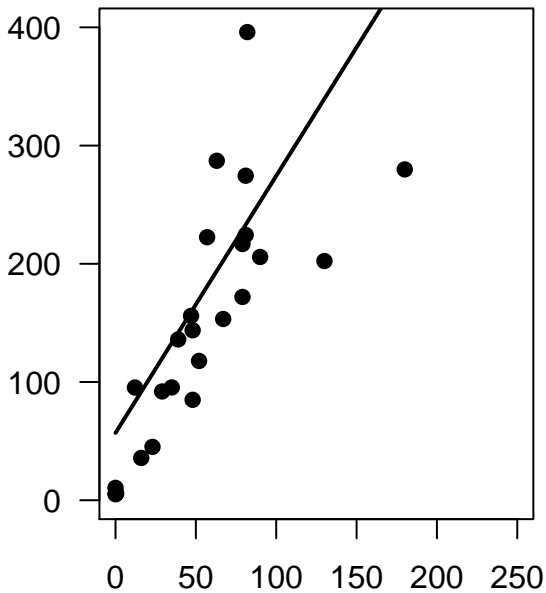

SLN gene expression

SERCA activity (?mol ATP mg<sup>-1</sup> min<sup>-1</sup>)

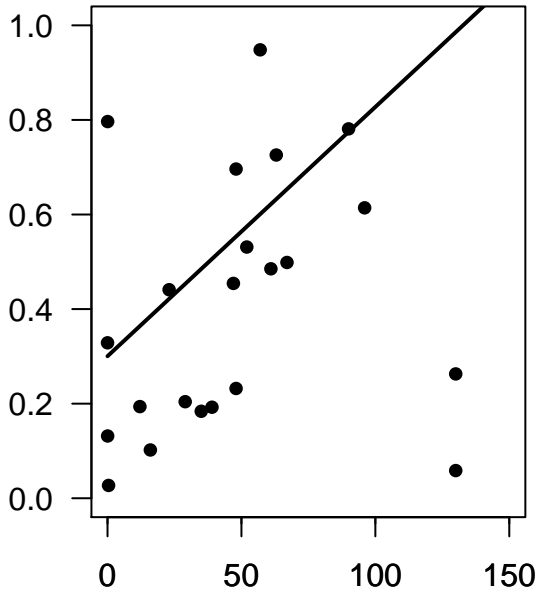

SLN gene expression

SERCA activity (?mol ATP mg<sup>-1</sup> min<sup>-1</sup>)

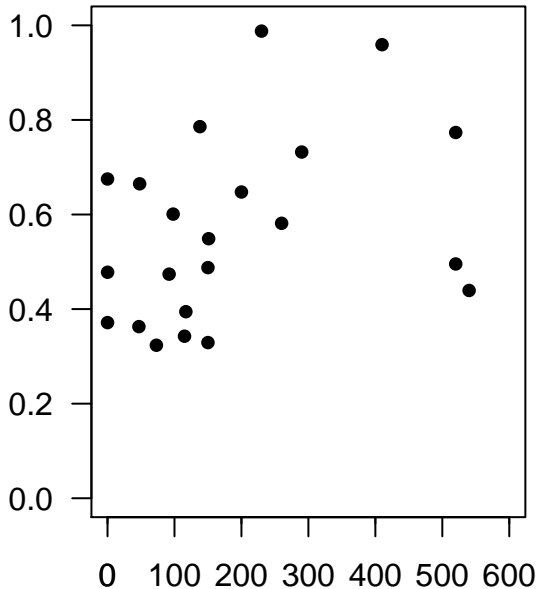

SERCA1 gene expression

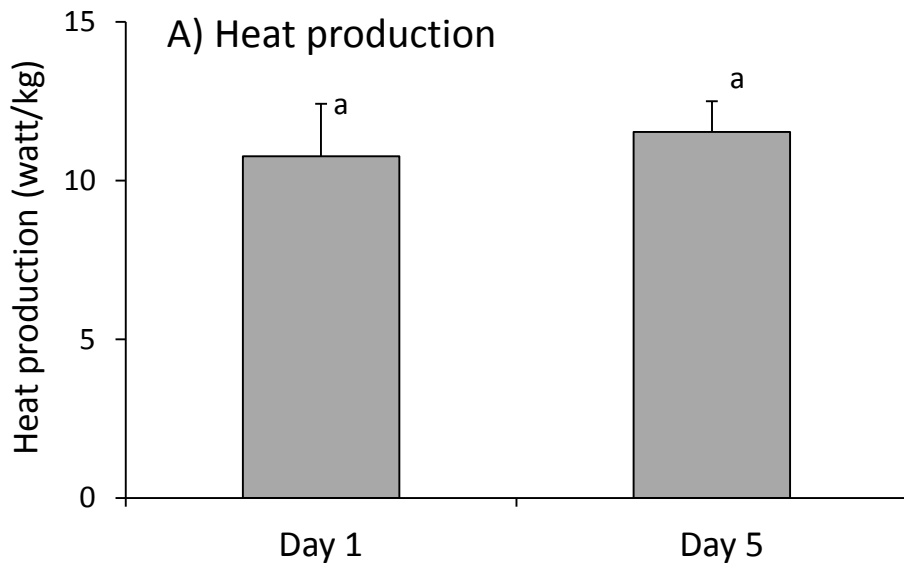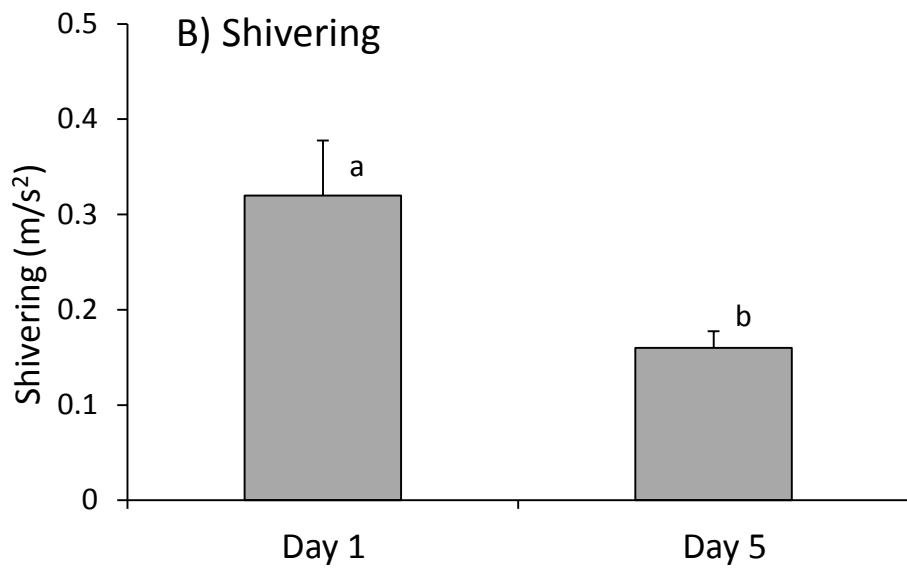

Source: https://www.biorxiv.org/content/10.1101/377051v1.full.pdf
